# Supplementary material
Source: Springer Nature journal article supplement (https://www.springermedizin.de/resource/supplementary/12937_2010_285_MOESM4_ESM.pdf/25654784)

RFU (Ex485/Em535 nm)

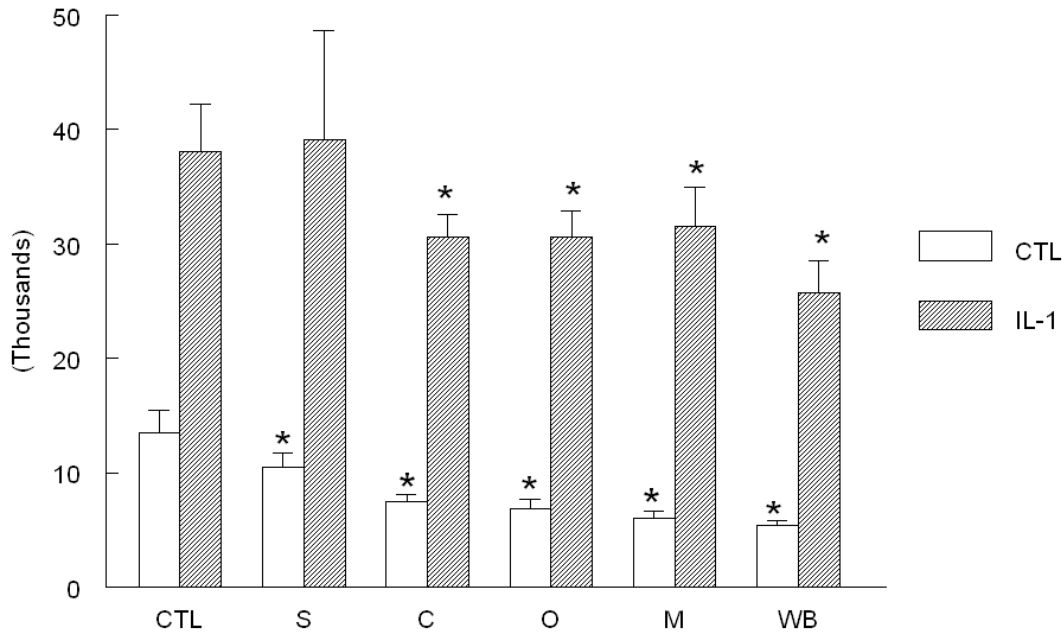

Supplement: MOESM4 [file 25654784]
